# Supplementary material for: Modelling of thermal transport through a nanocellular polymer foam: toward the generation of a new superinsulating material
Source: Royal Society of Chemistry journal article supplement (doi:10.1039/c7nr00327g), 2017-01-01
Supplement: c7nr00327g1.pdf [file c7nr00327g1.pdf]

## Supplementary Information

### **Modelling of thermal transport through the nanocellular polymer foam: Toward the generation of a new superinsulating material**

*Guilong Wang,\*<sup>a,b</sup> Chongda Wang,<sup>b</sup> Jinchuan Zhao,<sup>b,c</sup> Guizhen Wang,<sup>d</sup>*

*Chul B. Park\*<sup>b</sup> and Guoqun Zhao\*<sup>a</sup>*

<sup>a</sup>. Key Laboratory for Liquid-Solid Structural Evolution and Processing of Materials, School of Materials Science and Engineering, Shandong University, Jinan, Shandong 250061, China.

<sup>b</sup>. Microcellular Plastics Manufacturing Laboratory, Department of Mechanical and Industrial Engineering, University of Toronto, Toronto, Ontario M5T3G8, Canada.

<sup>c</sup>. Centre for Precision Engineering, School of Mechatronics Engineering, Harbin Institute of Technology, Harbin, Heilongjiang 150001, China.

<sup>d</sup>. Key Laboratory of Chinese Education Ministry for Tropical Biological Resources, Hainan University, Haikou, Hainan 570228, China.

\*To whom correspondence should be addressed.

Email: [guilong@sdu.edu.cn](mailto:guilong@sdu.edu.cn), [park@mie.utoronto.ca](mailto:park@mie.utoronto.ca), [zhaogq@sdu.edu.cn](mailto:zhaogq@sdu.edu.cn).

#### **Content:**

**Fig. S1** Comparison of the calculated upper and lower limits of the effective thermal conductivity contributed by thermal conduction

**Fig. S2** SEM images of the cellular structure of a typical polymer foam fabricated by batch foaming

**Fig. S3** Comparison of modelling results with experimentally measured data. (a) EPS foams.<sup>1</sup> (b) Polyolefin foams.<sup>2</sup> (c) Low-density EPS foams.<sup>3</sup> **Note:** The EPS foam's structure parameters are not available in reference 1. The equation provided by Schellenberg and Wallis<sup>4</sup> was used to correlate the cell size with the foam density.

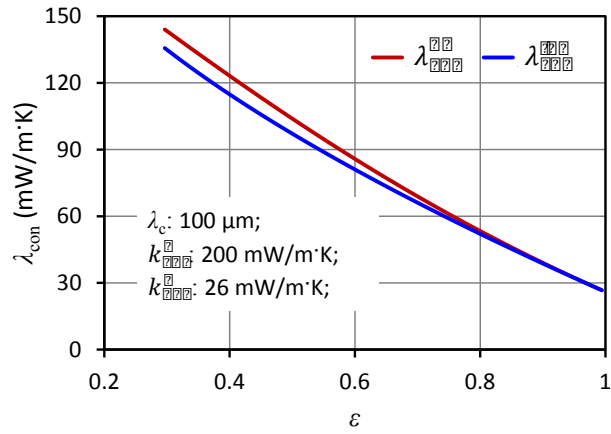

**Fig. S1** Comparison of the calculated upper and lower limits of the effective thermal conductivity contributed by thermal conduction

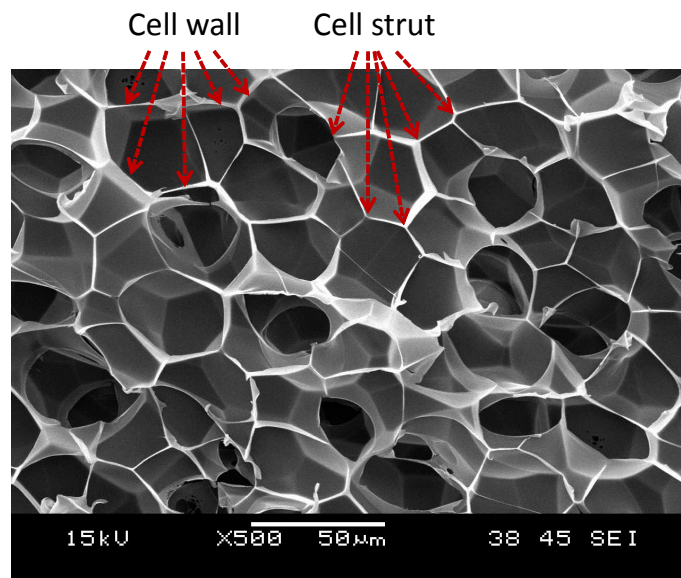

**Fig. S2** SEM images of the cellular structure of a typical polymer foam fabricated by batch foaming

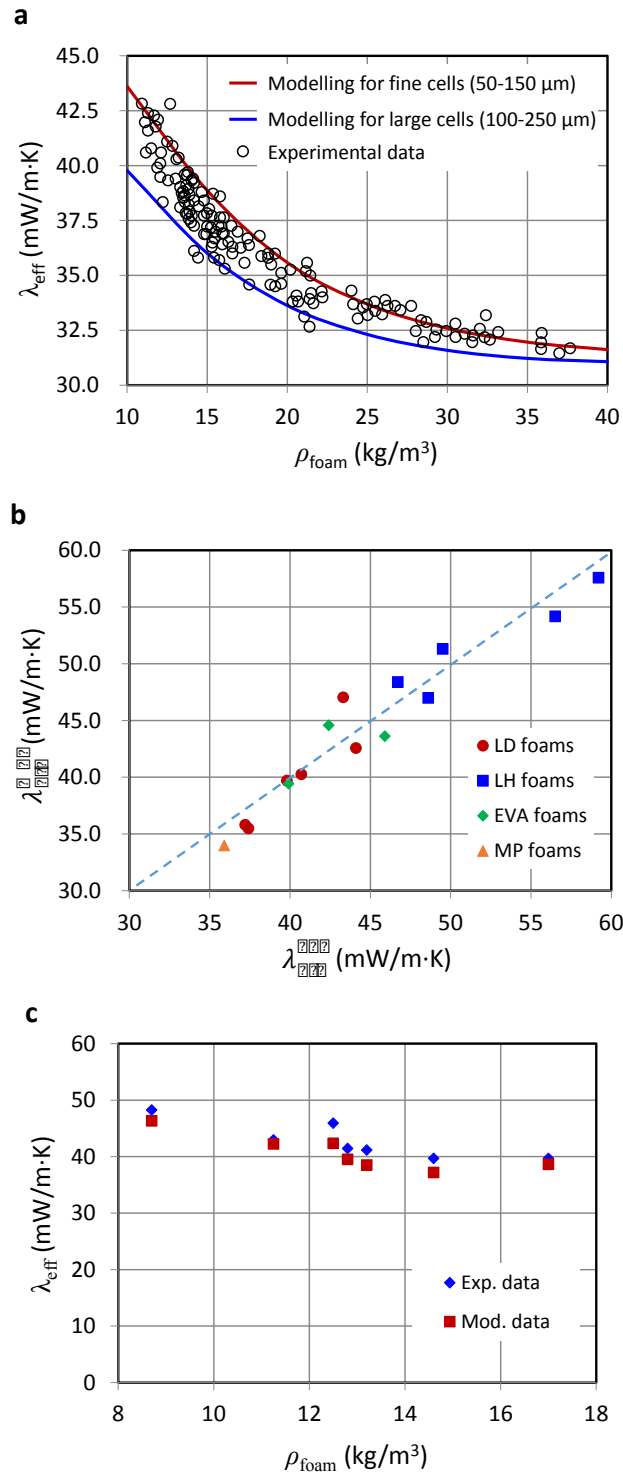

**Fig. S3** Comparison of modelling results with experimentally measured data. (a) EPS foams.<sup>1</sup> (b) Polyolefin foams (Low-density polyethylene (LD) foam, Low-density polyethylene (50%) + High-density polyethylene (50%) (LH) foam, Ethylene vinyl acetate copolymer (EVA) foam, and Metallocene polyethylene (MP) foam).<sup>2</sup> (c) Low-density EPS foams.<sup>3</sup> **Note:** In Fig. S3a, the EPS foam's structure parameters are not available in reference 1. The equation provided by Schellenberg and Wallis<sup>4</sup> was used to correlate the cell size with the foam density.

## References

1. I. Gnyp, S. Vejelis and S. Vaitkus. Thermal conductivity of expanded polystyrene (EPS) at 10 degrees C and its conversion to temperatures within interval from 0 to 50 degrees C. *Energ. Buildings* 2012, **52**, 107-111.
2. O. A. Almanza, M. A. Rodriguez-Perez and J. A. De Saja. Prediction of the radiation term in the thermal conductivity of crosslinked closed cell polyolefin foams. *J. Polym. Sci. Pol. Phys.* 2000, **38**, 993-1004.
3. R. Coquard and D. Baillis. Modeling of heat transfer in low-density EPS foams. *J. Heat Trans.-T ASME* 2006, **128**, 538-549.
4. J. Schellenberg and M. Wallis. Dependence of Thermal Properties of Expandable Polystyrene Particle Foam on Cell Size and Density. *J. Cell. Plast.* 2010, **46**, 209-222.
